# Supplementary material
Source: publisher figshare collection journal article supplement (https://acs.figshare.com/ndownloader/files/12560225)
Supplement: Supplementary file 1 [file 12560225]

## **Supporting Information**

### **Photon Upconverted Emission Based on Dye-Sensitized Triplet–Triplet Annihilation in Silica Sol–Gel System**

Hiromasa Nishikiori <sup>1,2,3\*</sup>, Masahiro Takeshita <sup>2</sup>, Yoshihiro Komatsu <sup>1</sup>, Hiroshi Satozono <sup>4</sup>,  
Katsuya Teshima <sup>1,2,3</sup>

<sup>1</sup> Department of Materials Chemistry, Graduate School of Science and Technology, Shinshu University, 4-17-1 Wakasato, Nagano 380-8553, Japan

<sup>2</sup> Department of Environmental Science and Technology, Faculty of Engineering, Shinshu University, 4-17-1 Wakasato, Nagano 380-8553, Japan

<sup>3</sup> Center for Energy and Environmental Science, Shinshu University, 4-17-1 Wakasato, Nagano 380-8553, Japan

<sup>4</sup> Central Research Laboratory, Hamamatsu Photonics K.K., 5000 Hirakuchi, Hamamatsu, Shizuoka 434-8601, Japan

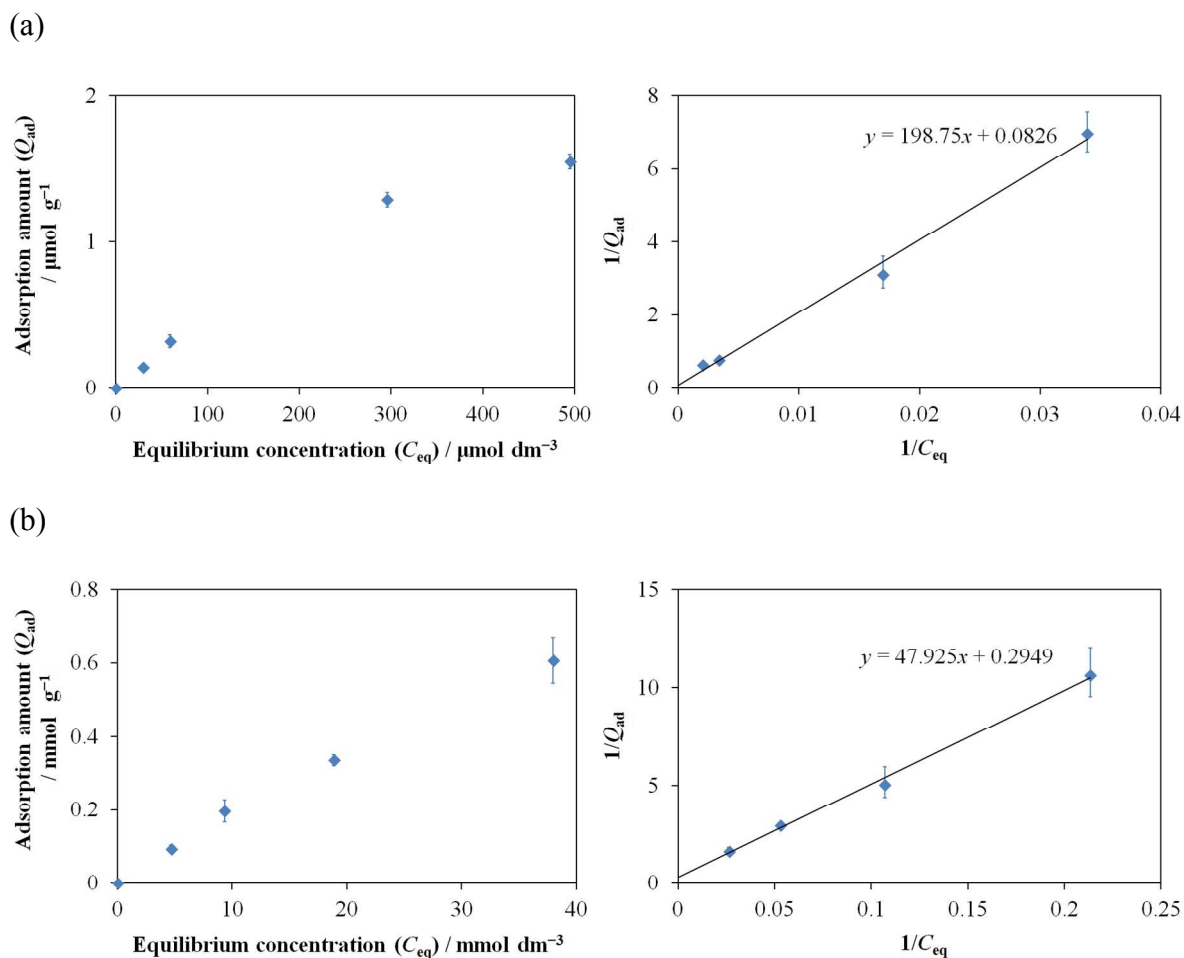

**Figure S1** Langmuir isotherms of the (a) PtOEP and (b) DPA adsorption on the silica gel particles. The abscissa and ordinate indicate the equilibrium concentration of PtOEP or DPA and the amount of that adsorbed per gram of the silica gel, respectively.

**Table S1** Fitting parameters of the Langmuir isotherms ( $Q_{ad}/Q_{max} = K_{ad}C_{eq}/(1+K_{ad}C_{eq})$ ) of PtOEP and DPA adsorption on the silica gel particles.

| Adsorbate | $K_{ad}/\text{dm}^3 \text{ mol}^{-1}$ | $Q_{max}/\text{mmol g}^{-1}$ |
|-----------|---------------------------------------|------------------------------|
| PtOEP     | 416                                   | 0.0121                       |
| DPA       | 6.15                                  | 3.39                         |

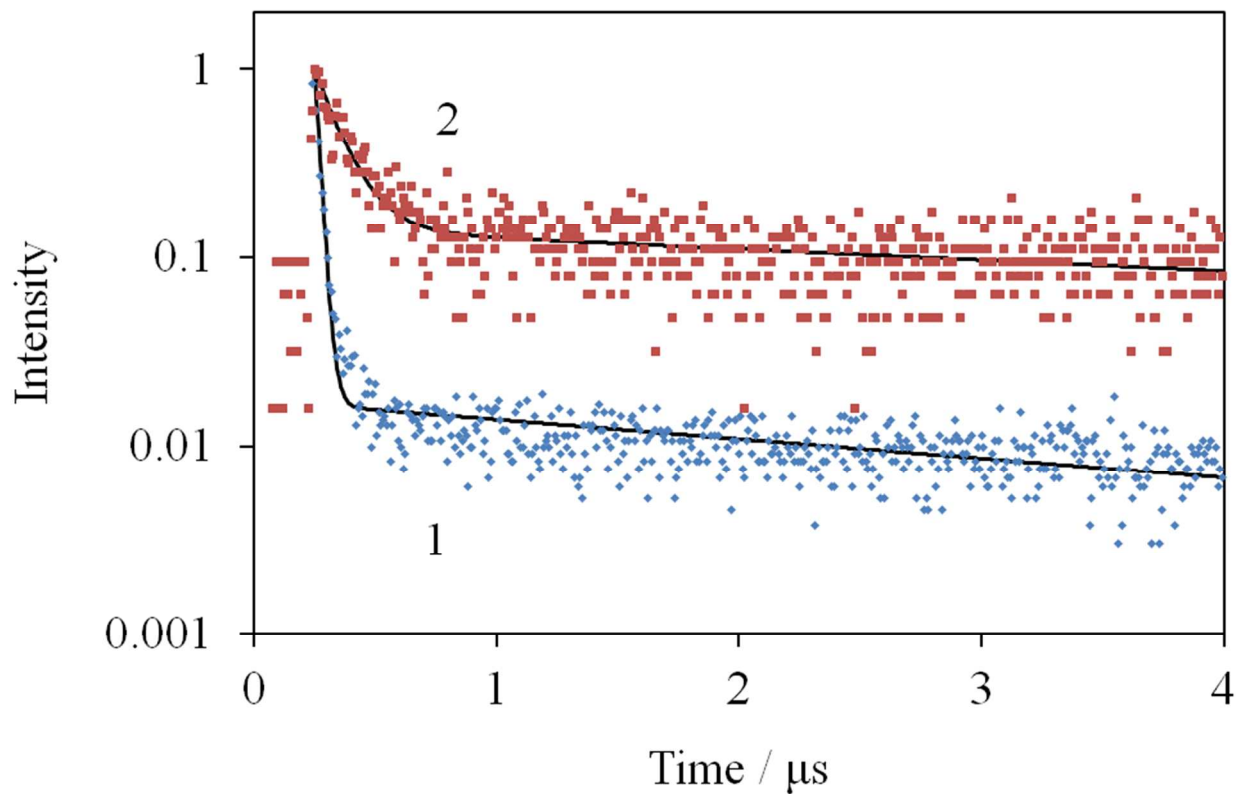

**Figure S2** Emission decay and the fitted double exponential function ( $A_1\exp(-t/\tau_1) + A_2\exp(-t/\tau_2)$ ) curves of the PtOEP (1) adsorbed on the surface of the silica gel particles, and (2) encapsulated in the silica gel networks. The emission was monitored at 645 nm.

**Table S2** Fitting parameters of the emission decay curves of the PtOEP (1) adsorbed on the surface of the silica gel particles, and (2) encapsulated in the silica gel networks.

| Sample | $A_1$ | $\tau_1/\mu\text{s}$ | $A_2$ | $\tau_2/\mu\text{s}$ |
|--------|-------|----------------------|-------|----------------------|
| 1      | 0.984 | 0.0203               | 0.016 | 4.22                 |
| 2      | 0.860 | 0.110                | 0.140 | 7.49                 |

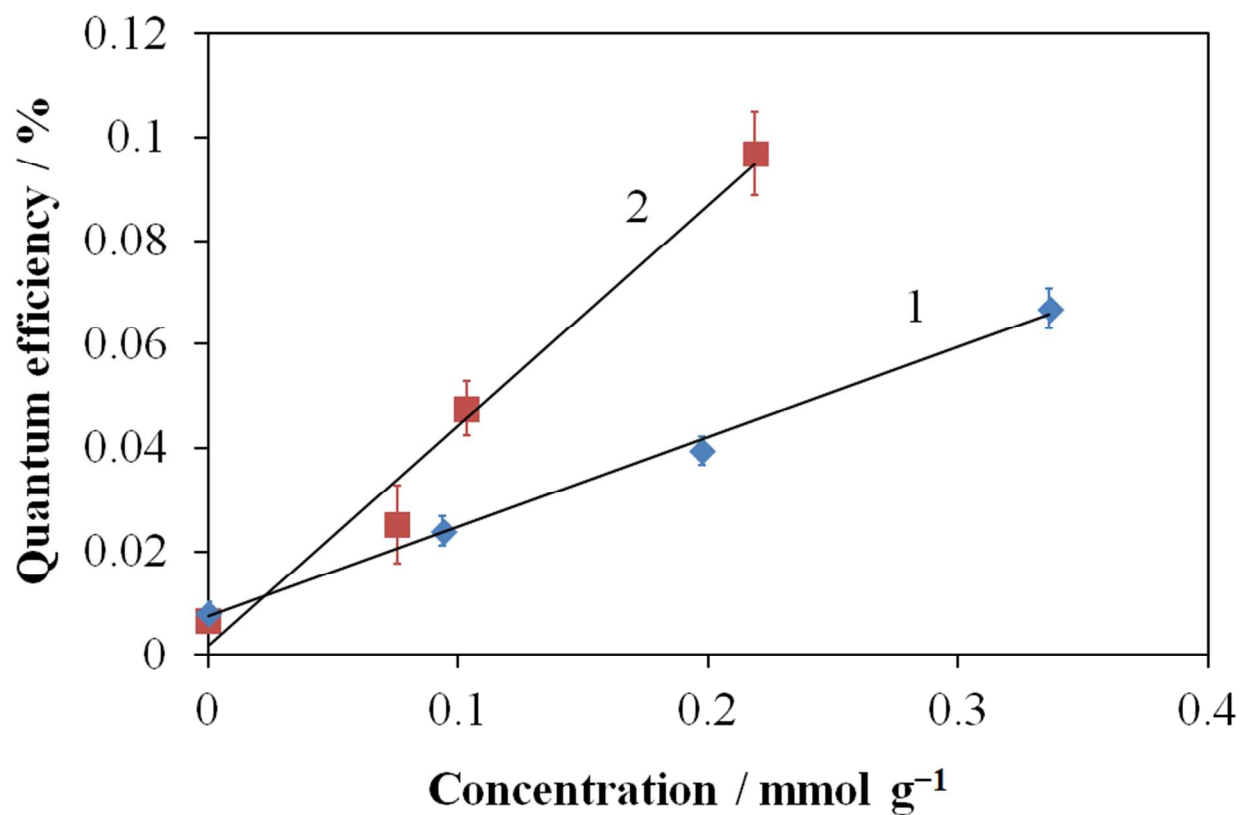

**Figure S3** DPA concentration dependence of the relative quantum efficiency of the upconverted emission in (1) the silica gel samples adsorbing PtOEP and DPA, and (2) those encapsulating PtOEP and adsorbing DPA.

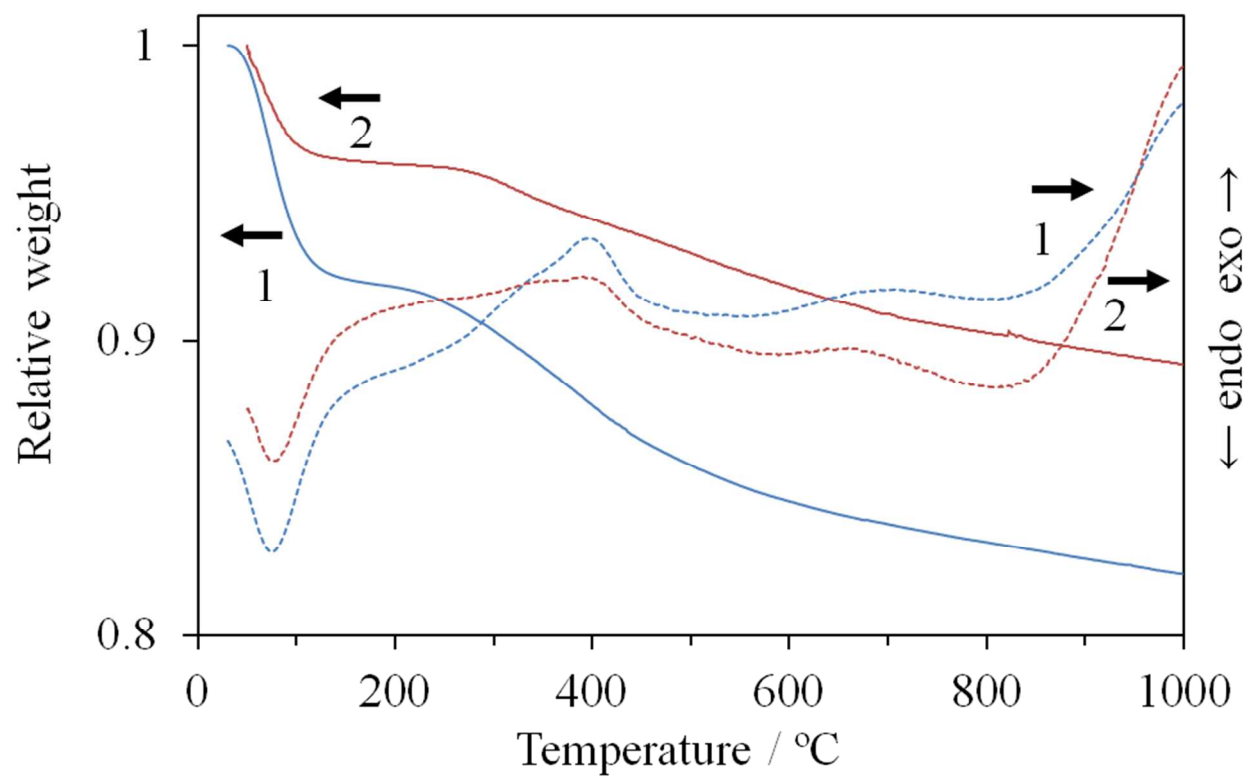

**Figure S4** TG-DTA curves of the silica gel samples dried at (1) 25 and (2) 60 °C.

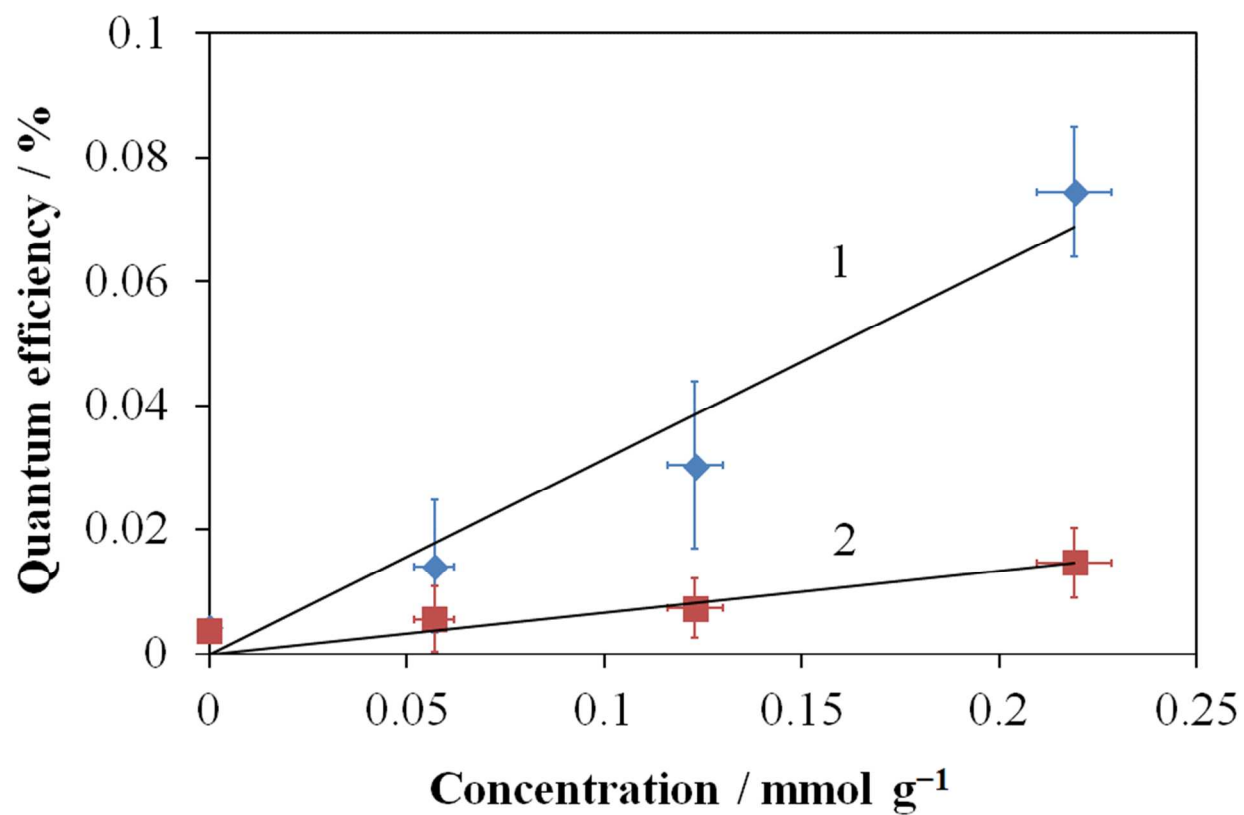

**Figure S5** DPA concentration dependence of the relative quantum efficiency of the upconverted emission in the samples dried at (1) 25 and (2) 60 °C.

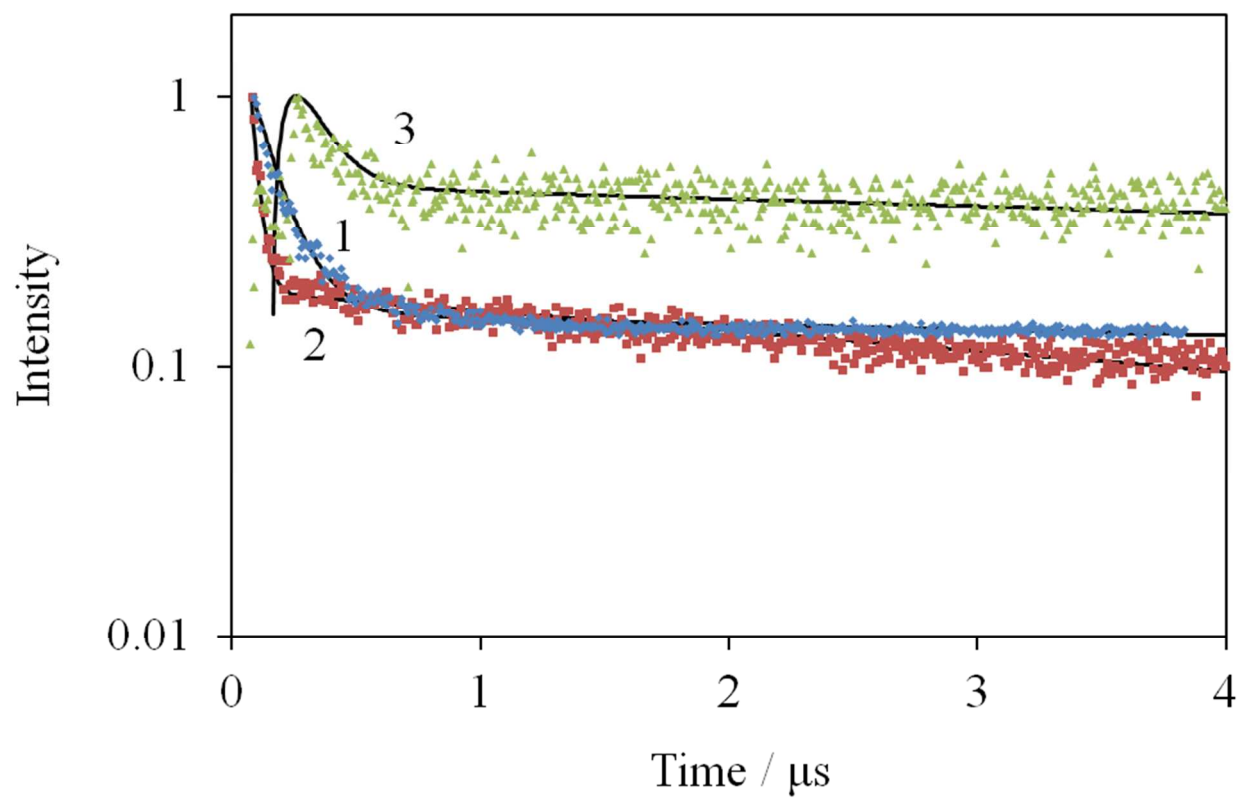

**Figure S6** Phosphorescence decay curves of (1) the wetter silica gel sample encapsulating PtOEP and (2) that encapsulating PtOEP and adsorbing DPA, and (3) upconverted emission rise and decay curve of that encapsulating PtOEP and adsorbing DPA. The emission was monitored at (1,2) 645 and (3) 430 nm.

**Table S3** Fitting parameters of the emission decay curves of (1) the wetter silica gel sample encapsulating PtOEP and (2) that encapsulating PtOEP and adsorbing DPA, and (3) emission rise and decay curve of that encapsulating PtOEP and adsorbing DPA.

| Sample | $A_1$  | $\tau_1/\mu\text{s}$ | $A_2$   | $\tau_2/\mu\text{s}$ | $A_3$   | $\tau_3/\mu\text{s}$ |
|--------|--------|----------------------|---------|----------------------|---------|----------------------|
| 1      | 0.844  | 0.115                | 0.156   | 21.5                 |         |                      |
| 2      | 0.812  | 0.0298               | 0.188   | 5.82                 |         |                      |
| 3      | 0.999  | 0.0800               | 0.998   | 0.806                | 0.002   | 16.5                 |
|        | (rise) |                      | (decay) |                      | (decay) |                      |
